# Supplementary material for: Effects of Ejiao peptide–iron chelates on intestinal inflammation and gut microbiota in iron deficiency anemic mice
Source: Royal Society of Chemistry journal article supplement (doi:10.1039/d1fo01802g), 2021-01-01
Supplement: d1fo01802g1.pdf [file d1fo01802g1.pdf]

## Supplementary information

Table s1

| Sample  | #Raw Tags          | #PE_reads        | #Nochimera       | AvgLen(bp)  | GC(%)      |
|---------|--------------------|------------------|------------------|-------------|------------|
| CON     | 149835.50±16173.27 | 74917.75±8086.64 | 35027.25±2901.11 | 444.94±1.05 | 52.52±0.30 |
| IDA     | 119943.00±13613.08 | 59971.50±6806.54 | 40029.50±1826.12 | 454.48±1.02 | 51.26±0.46 |
| Fe-L    | 152678.00±6753.53  | 76339.00±3376.77 | 68260.50±3280.71 | 454.97±0.64 | 51.10±0.06 |
| Fe-M    | 130756.50±15744.61 | 65378.25±7872.30 | 60341.50±7502.04 | 454.12±0.67 | 52.25±0.53 |
| Fe-H    | 136557.00±9414.24  | 68278.50±4707.12 | 61748.00±4832.12 | 454.36±0.98 | 51.30±0.72 |
| EPI-L   | 144241.50±7562.99  | 72120.75±3781.49 | 63113.50±2680.36 | 453.52±0.97 | 51.40±0.22 |
| EPI-M   | 138763.00±10709.37 | 69381.50±5354.69 | 61632.00±4692.03 | 452.52±0.22 | 52.47±0.30 |
| EPI-H   | 121949.50±9113.06  | 60974.75±4556.53 | 53110.00±4267.00 | 452.57±0.50 | 51.59±0.57 |
| average | 136840.50±4151.57  | 68420.25±2075.79 | 55407.78±2404.33 | 452.69±0.60 | 51.74±0.17 |
